# Supplementary material for: Integrated Signals of Jasmonates, Sugars, Cytokinins and Auxin Influence the Initial Growth of the Second Buds of Chrysanthemum after Decapitation
Source: MDPI journal article supplement (doi:10.3390/biology10050440), 2021-05-16

Supplemental Figures

Integrated signals of jasmonates, sugars, cytokinins and auxin influence the initial growth of the second buds of chrysanthemum after decapitation

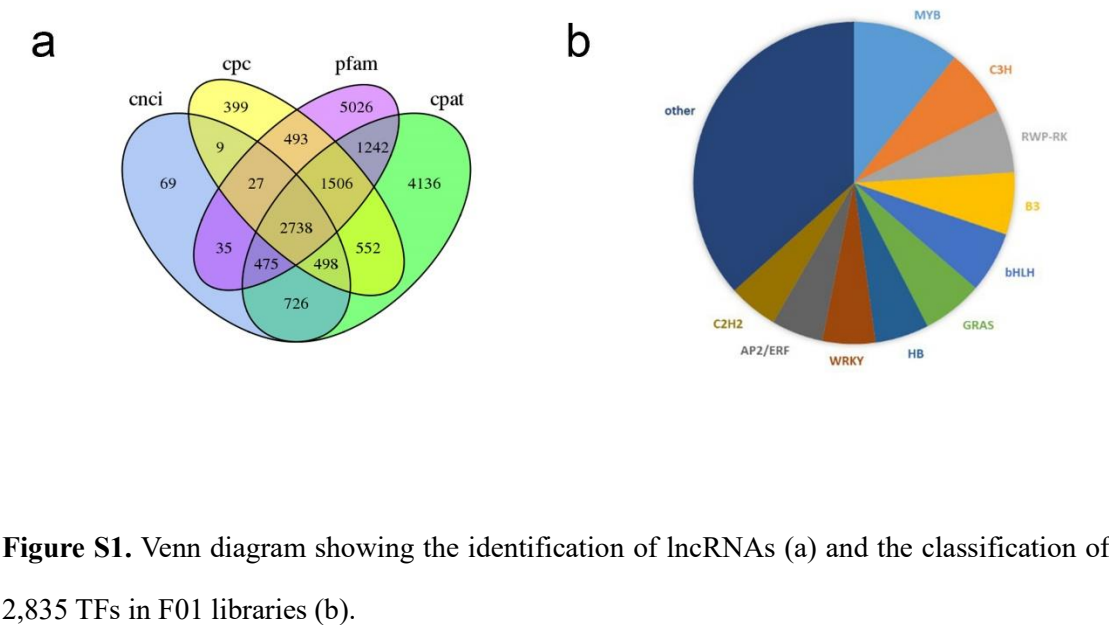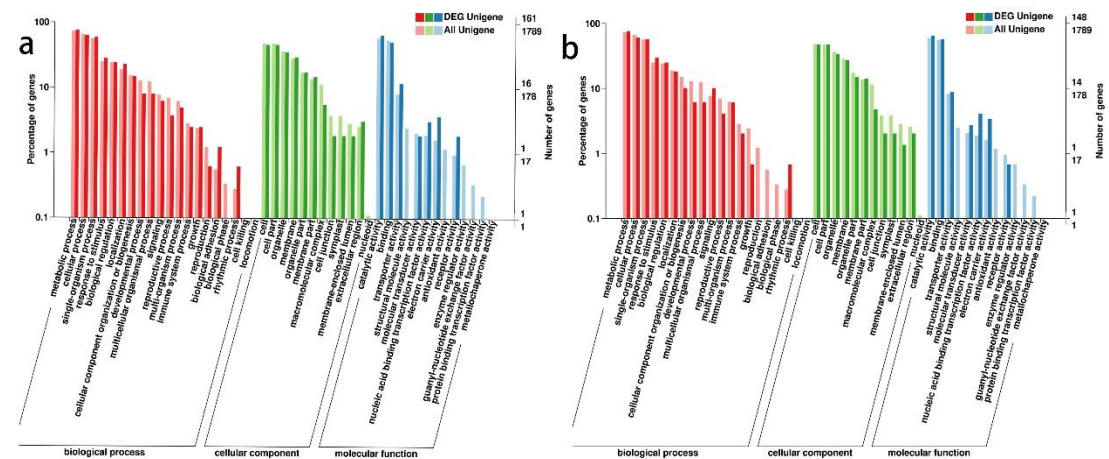

Supplement: s1 [file s1]
